# Supplementary material
Source: PubMed Central journal article supplement (PMC4836339)
Supplement: JVI.03184-15_zjv999091612so1.pdf [file JVI.03184-15_zjv999091612so1.pdf]

1 **Supplementary data**

2

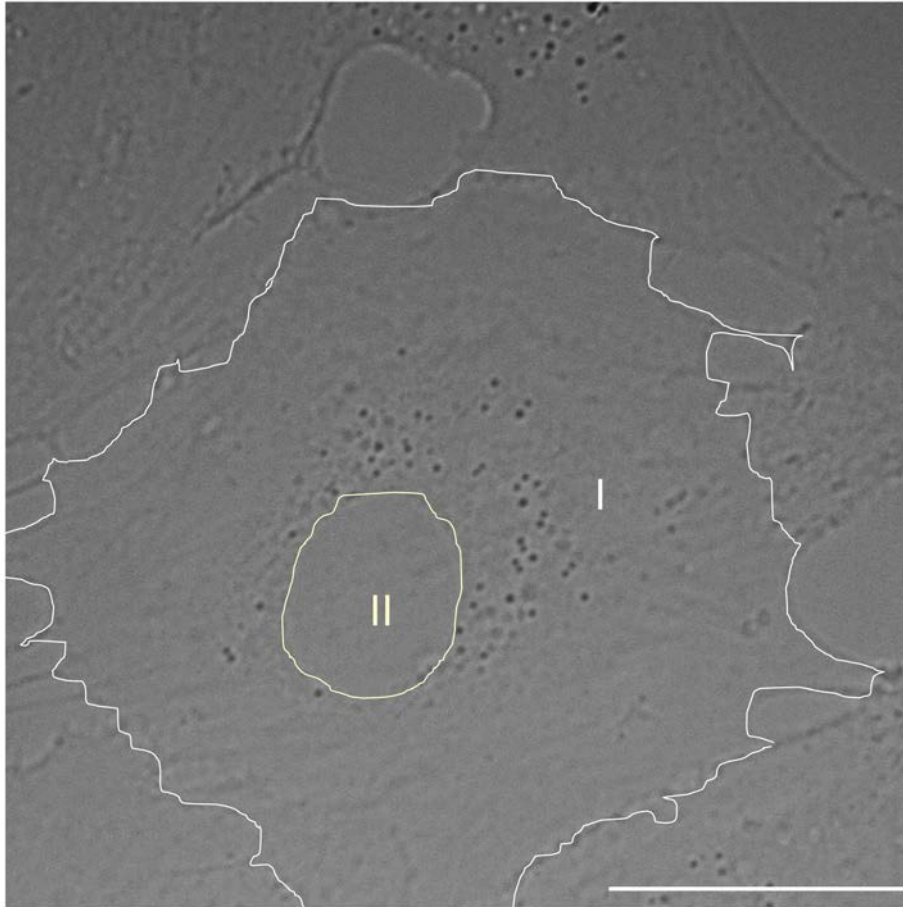

3

4

5 **FIG. S1. Representative DIC image of a BS-C-1 cell.** In the DIC image the plasma membrane and the  
6 nucleus are indicated with a white and off-white line, respectively. The numbers I and II designate  
7 cytoplasm and nucleus, respectively. Particles that fused above or in the direct vicinity ( $< 3 \mu\text{m}$ ) of  
8 the nucleus (II) were excluded from tracking behavior analysis. Scale bar:  $25 \mu\text{m}$ .

9

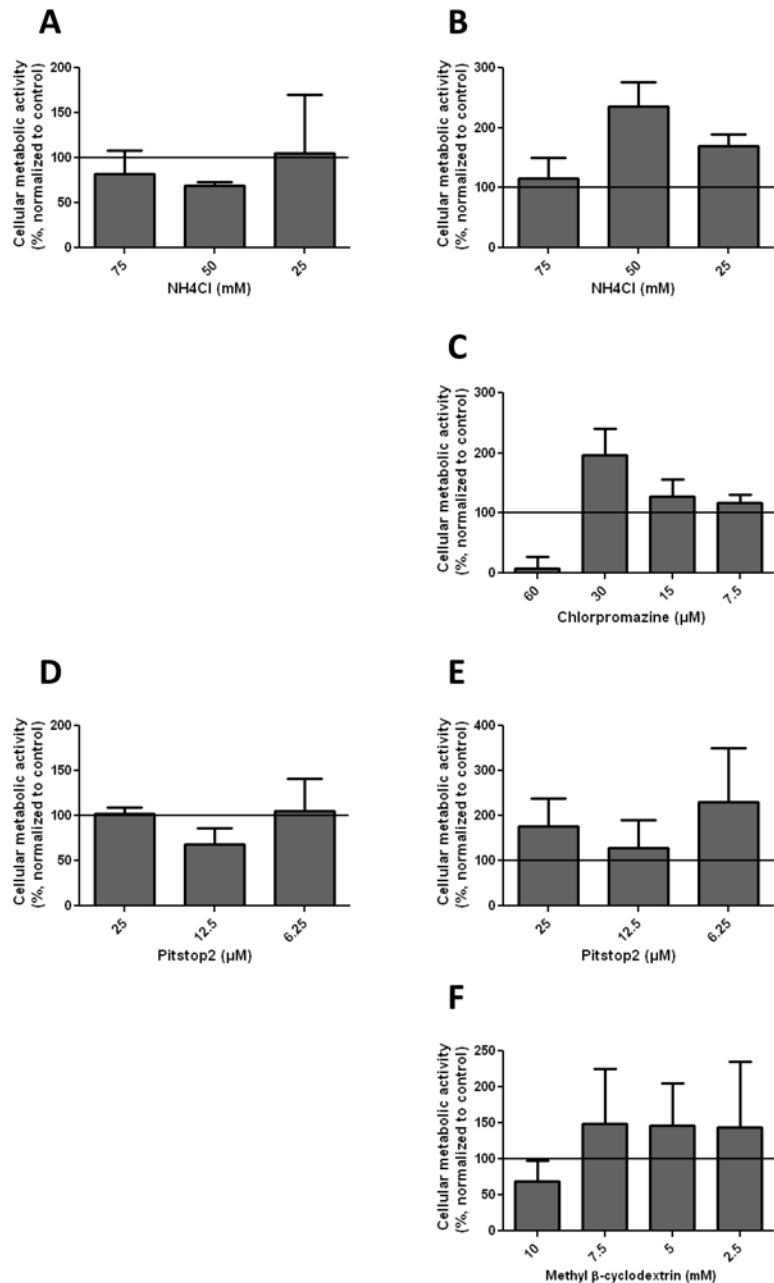

10

11

12 **FIG. S2. Cell viability assays.** MTT assays of BS-C-1 cells upon treatment with NH<sub>4</sub>Cl (A, B),  
 13 Chlorpromazine (C), Pitstop2 (D, E), and methyl- $\beta$ -cyclodextrin (F). In A and D cells were incubated  
 14 overnight (18 h) in presence of the inhibitor to mimic conditions during overnight infections. In B, C, E  
 15 and F cells were incubated with the inhibitor for a similar period as for the microscopic cell entry and  
 16 fusion assay, specifically 1.5 h for NH<sub>4</sub>Cl; 2.5 h for Chlorpromazine; 45 min for Pitstop2; and 1 h for  
 17 methyl- $\beta$ -cyclodextrin. For all compounds two individual experiments were performed in  
 18 triplicate. Error bars represent SD.

19

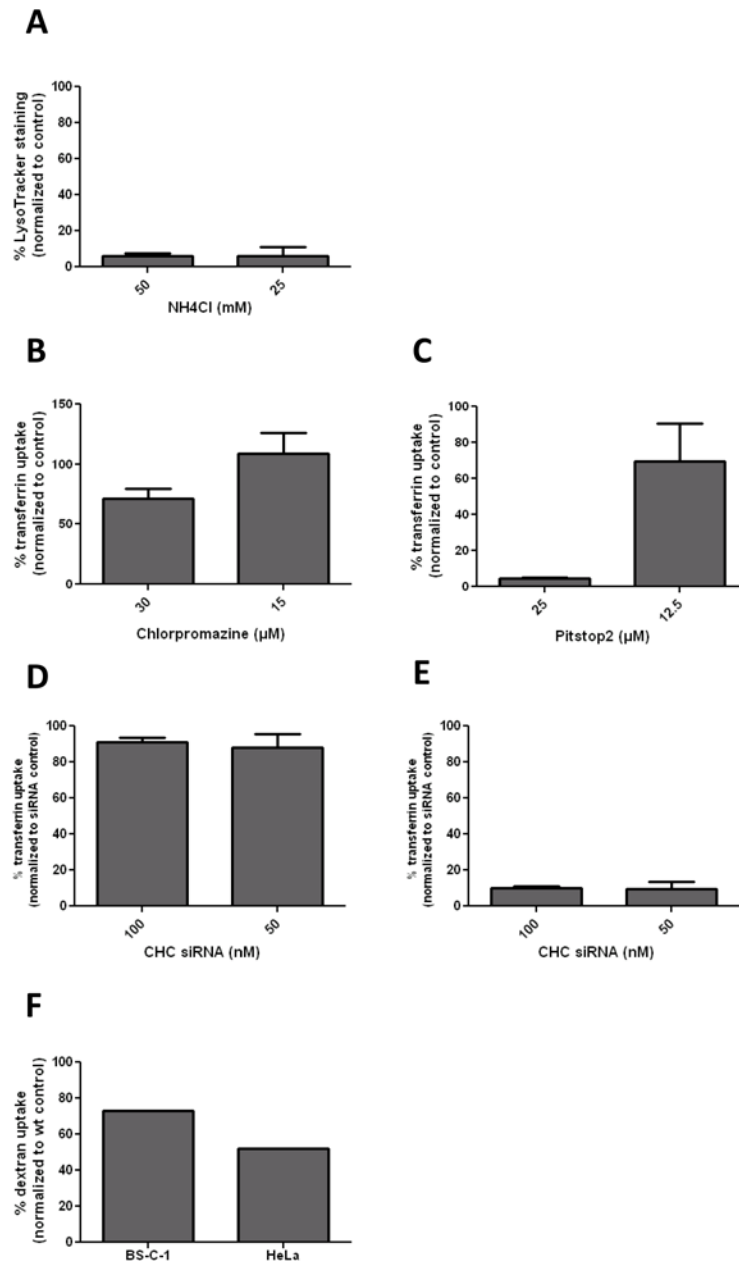

20  
21  
22  
23  
24  
25  
26  
27  
28  
29  
30  
31  
32

**FIG S3. Cargo control assays.** LysoTrackerGreen, Transferrin-AF633 and Dextran-TexasRed were used as cargo controls for NH4Cl (A); Chlorpromazine (B), Pitstop2 (C) and anti-CHC siRNAs (D,E); and Rab5-S34N (F), respectively. A-D, BS-C-1 cells; E, HeLa cells; F, both BS-C-1 and HeLa cells. (A-E) Cargo controls were analyzed by microscopy. Total fluorescence intensity was analyzed by the 'Particle Analyzer' plugin in ImageJ and normalized to the non-treated control or non-targeting siRNA control. At least three independent experiments were carried out for the cargo control experiments related to NH4Cl, Chlorpromazine, Pitstop2 and siRNAs. Error bars represent SD. (F) Cells were transfected with either wildtype Rab5-GFP or Rab5-S34N-GFP and 2 d post-transfection Dextran was added to the cells. Dextran uptake was analyzed by microscopy and assessed by eye for at least 70 GFP-positive cells per condition. The uptake of Dextran was normalized to the wild type control.

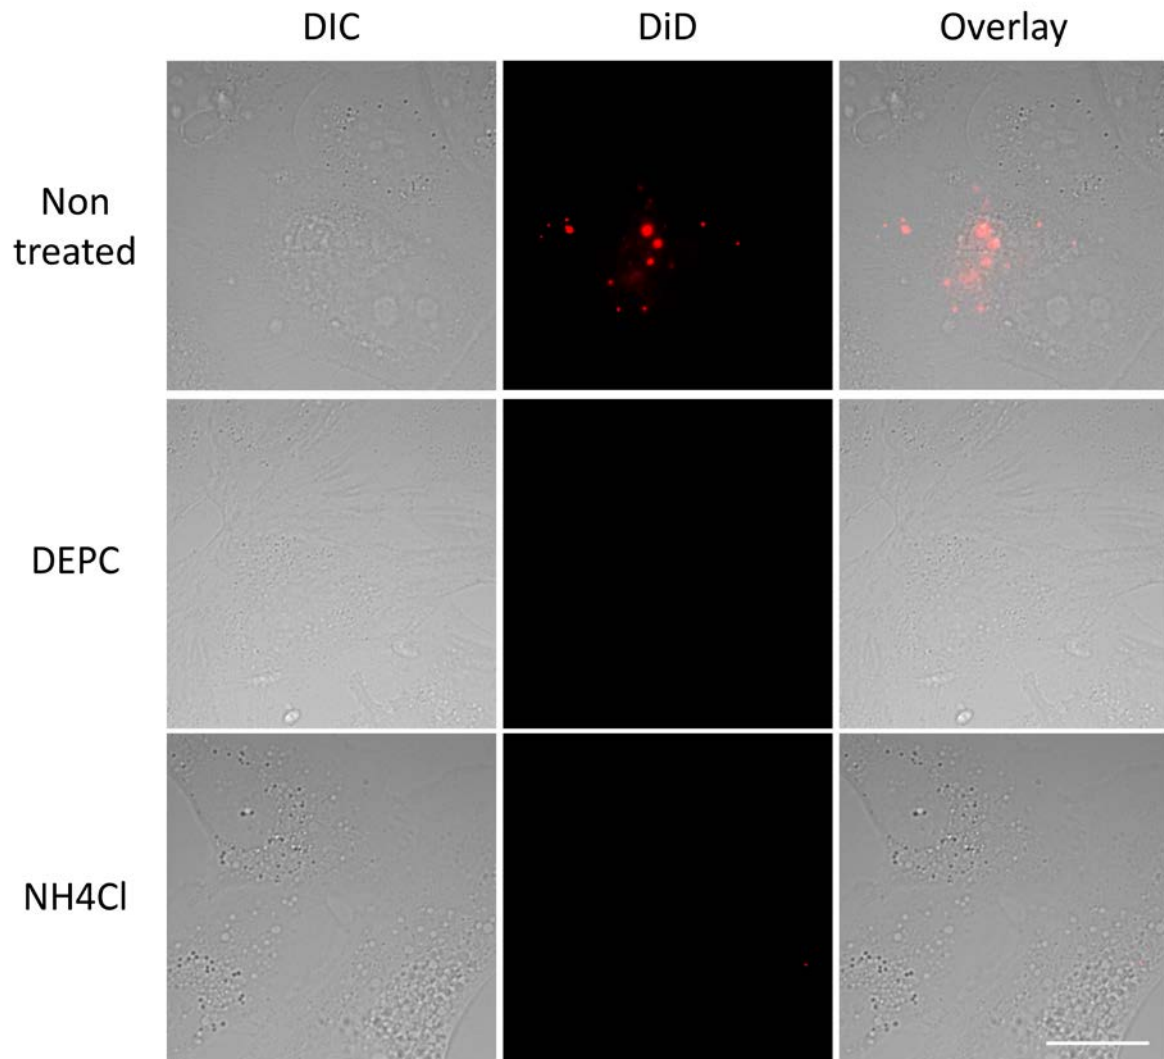

33  
34  
35  
36  
37  
38  
39  
40

**FIG. S4. CHIKV microscopic entry/fusion assay.** Representative images of cells infected with DiD-labeled CHIKV. Top, non-treated positive control; middle, DEPC treated DiD-labeled CHIKV (2 mM DEPC for 30 min); bottom, BS-C-1 cells prior treated with 50 mM NH<sub>4</sub>Cl for 1 h. One representative image per condition (DIC, DiD, overlay) is shown. Intensity is equally enhanced for visual purposes. Fusion events appear as bright red spots in the DiD channel. Scale bar: 25 μm.

# Supplementary data

## Fig. 5

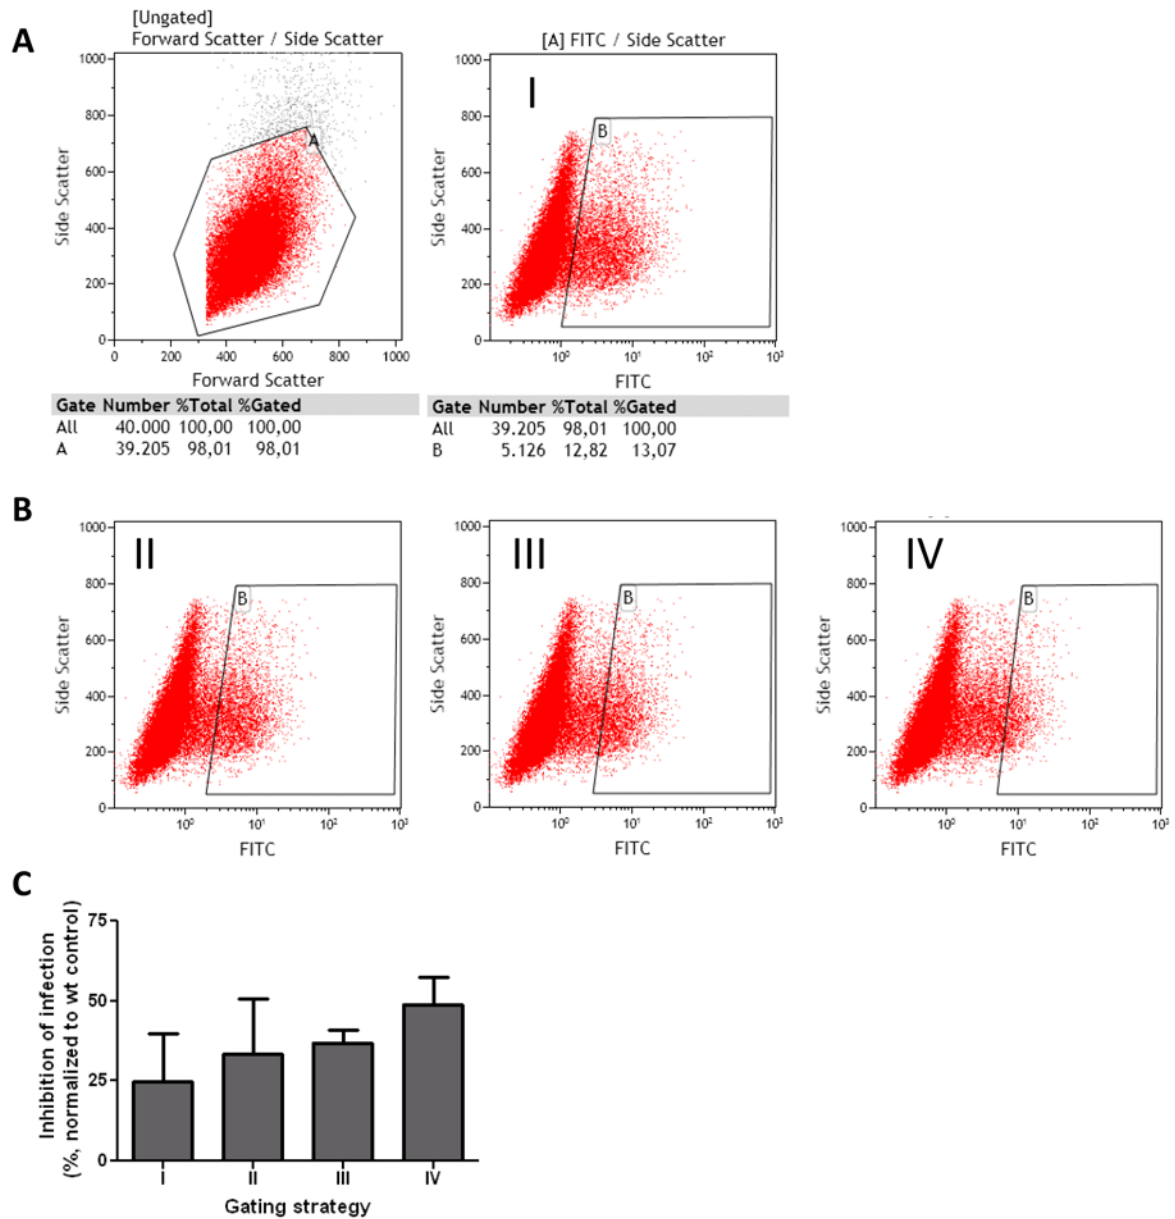

41  
42  
43  
44  
45  
46  
47  
48  
49  
50  
51

**FIG S5. Flow cytometry gating strategy in Rab5-GFP-expressing cells.** (A) Standard gating (I) strategy. (B) Step-wise gating as function of GFP expression (II-IV). (C) The percentage inhibition of infection found for Rab5-S34N compared to wild type Rab5 in the different GFP-gating strategies. The experiment is repeated twice in triplicate. Error bars represent SD.

52 **Video S1. CHIKV fusion event.** DiD-labeled CHIKV particle (red) resides in the left down corner  
53 before travelling towards the right upper corner and fusing. Fusion is seen as a sudden burst in  
54 fluorescence intensity. Movie shows the same particle as in Fig. 1A (no treatment). Image recording  
55 was performed at 1 frame/s. Virtual time is shown in the right down corner.

56

57 **Video S2. CHIKV/clathrin colocalization.** Movie S2A, S2B, S2D show a DiD-labeled CHIKV particle  
58 (red) that first colocalizes with clathrin-YFP, then the clathrin signal disappears and the virus travels  
59 through the cell and is visible till the moment of membrane fusion. Clathrin-YFP is green and  
60 colocalization is visible as yellow. Membrane fusion occurs in the last seconds of the movie and can  
61 be detected as a sudden increase in fluorescence intensity. In Movie S2C and S2E we zoom in on  
62 CHIKV-clathrin colocalization of movie S2B and S2D, respectively. Image recording was performed at  
63 1 frame/s. For all movies the virtual time is shown in the right down corner.

64

65 **Video S3. CHIKV fusion upon Rab5 colocalization.** S3A. DiD-labeled CHIKV particle that travels  
66 towards a Rab5-positive endosome and fuses within 2 s after colocalization. S3B. DiD-labeled CHIKV  
67 particle that travels towards a Rab5-positive endosome and fuses within 21 s after colocalization  
68 (virtual time). S3C. DiD-labeled CHIKV particle moves towards an early endosome and fuses  
69 approximately 30 seconds after initial colocalization (virtual time). For all movies virtual time is  
70 shown in the right down corner.
